# Supplementary material
Source: publisher site journal article supplement (https://www.kjim.org/upload/media/kjim-2022-375-Supplementary-Fig-1.pdf)
Supplement: Supplementary file 1 [file kjim-2022-375-Supplementary-Fig-1.pdf]

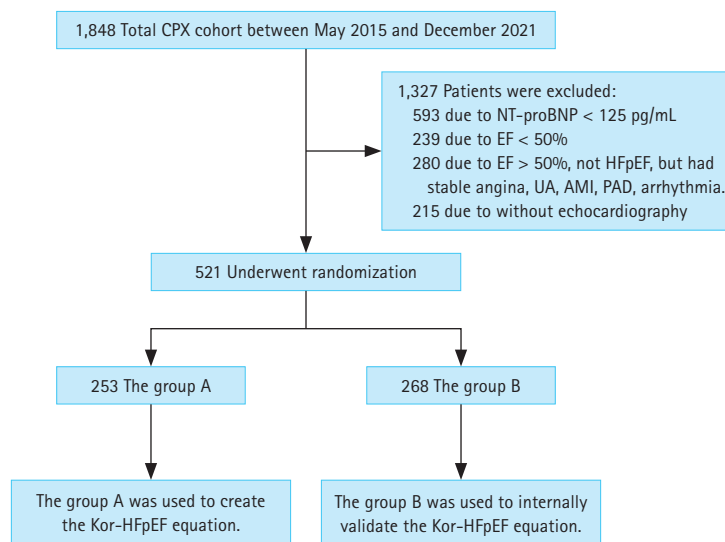

**Supplementary Figure 1.** Eligibility and randomization. CPX, cardiopulmonary exercise test; NT-proBNP, N-terminal pro-B-type natriuretic peptide; EF, ejection fraction; HFpEF, heart failure with preserved ejection fraction; UA, unstable angina; AMI, acute myocardial infarction; PAD, peripheral arterial disease.
